# Supplementary material for: Gut microbiome variation modulates the effects of dietary fiber on host metabolism
Source: PubMed Central journal article supplement (PMC8138933; doi:10.1186/s40168-021-01061-6), 2021-05-20

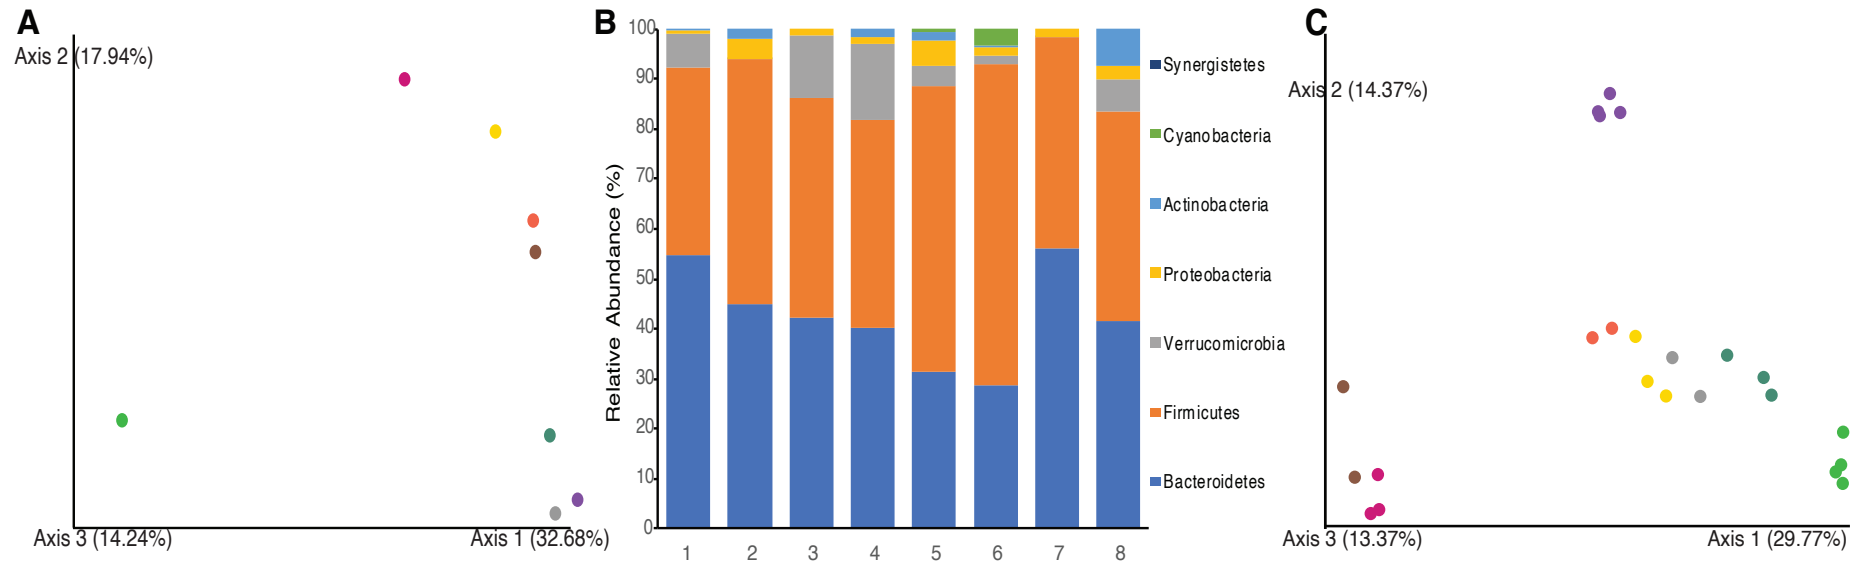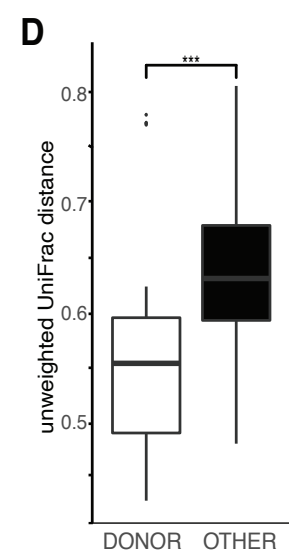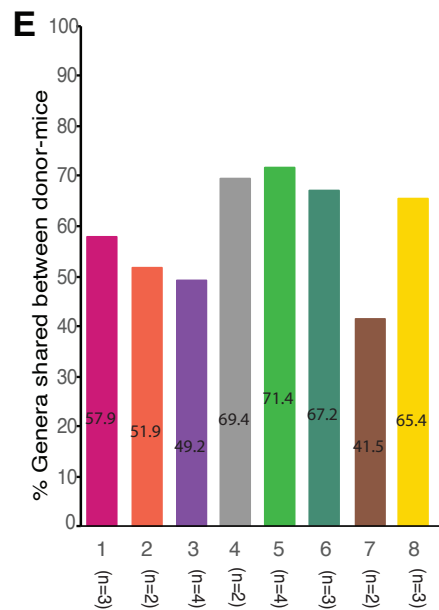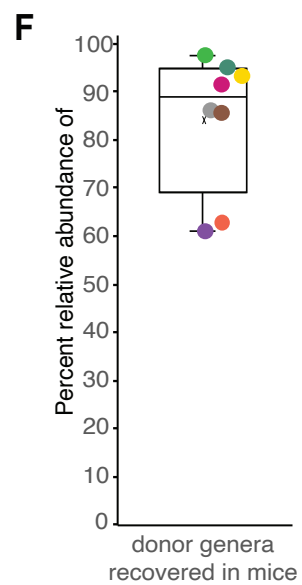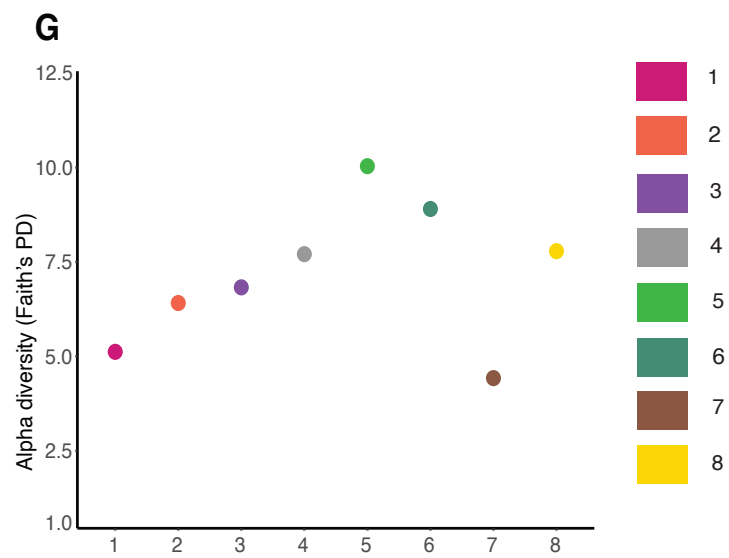

Supplement: 40168_2021_1061_MOESM2_ESM.pdf [file 40168_2021_1061_MOESM2_ESM.pdf]
