# Supplementary material for: Gut microbiome variation modulates the effects of dietary fiber on host metabolism
Source: PubMed Central journal article supplement (PMC8138933; doi:10.1186/s40168-021-01061-6), 2021-05-20
Supplement: 40168_2021_1061_MOESM11_ESM.pdf [file 40168_2021_1061_MOESM11_ESM.pdf]

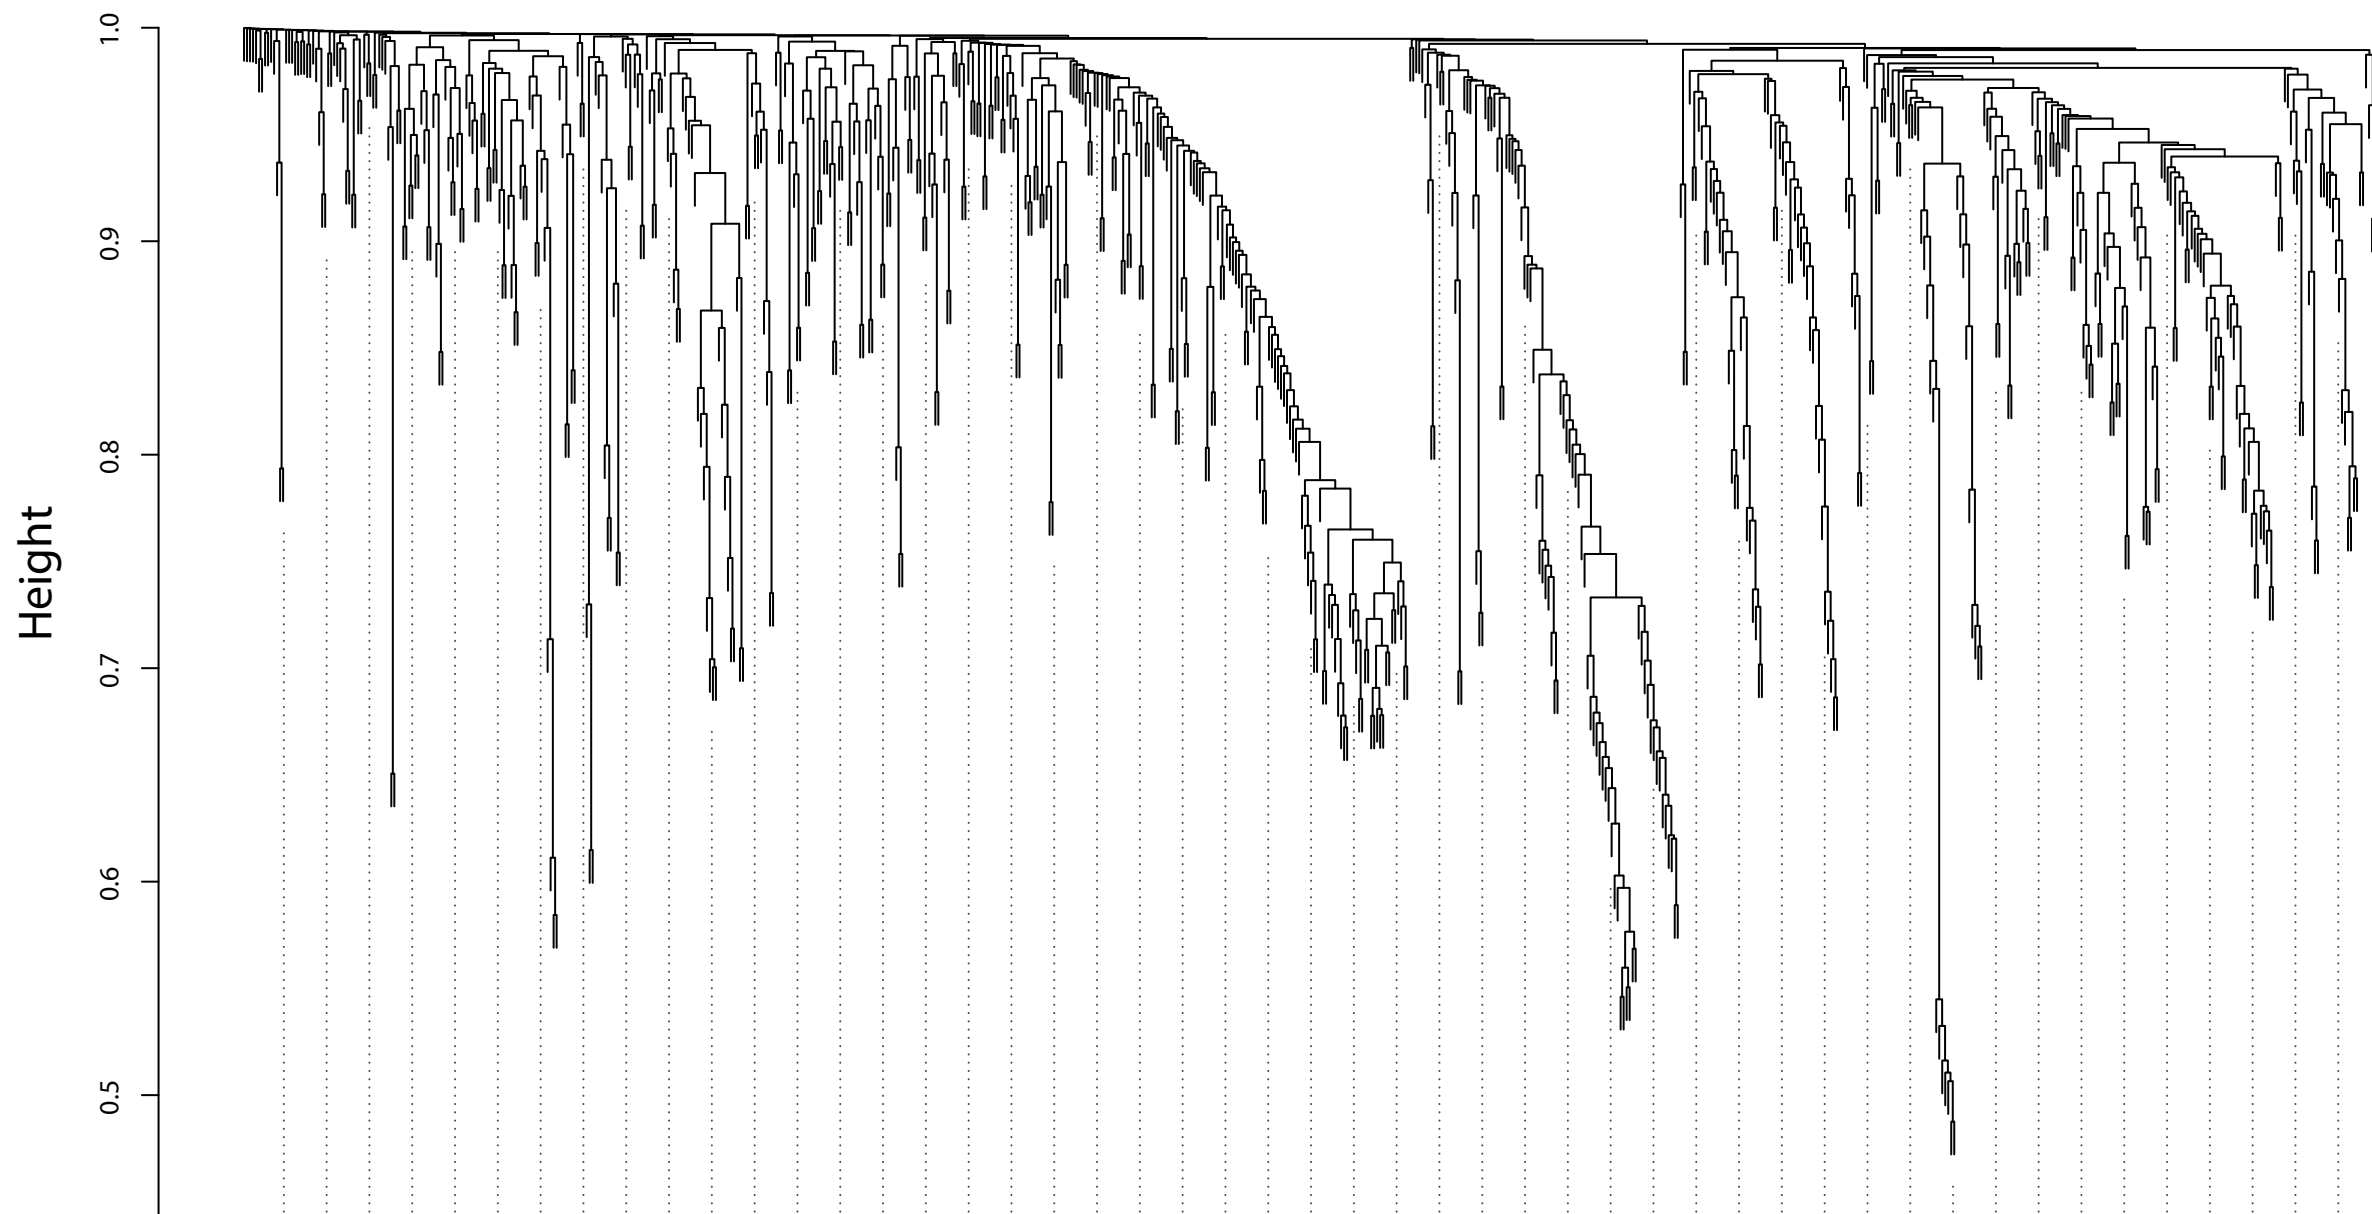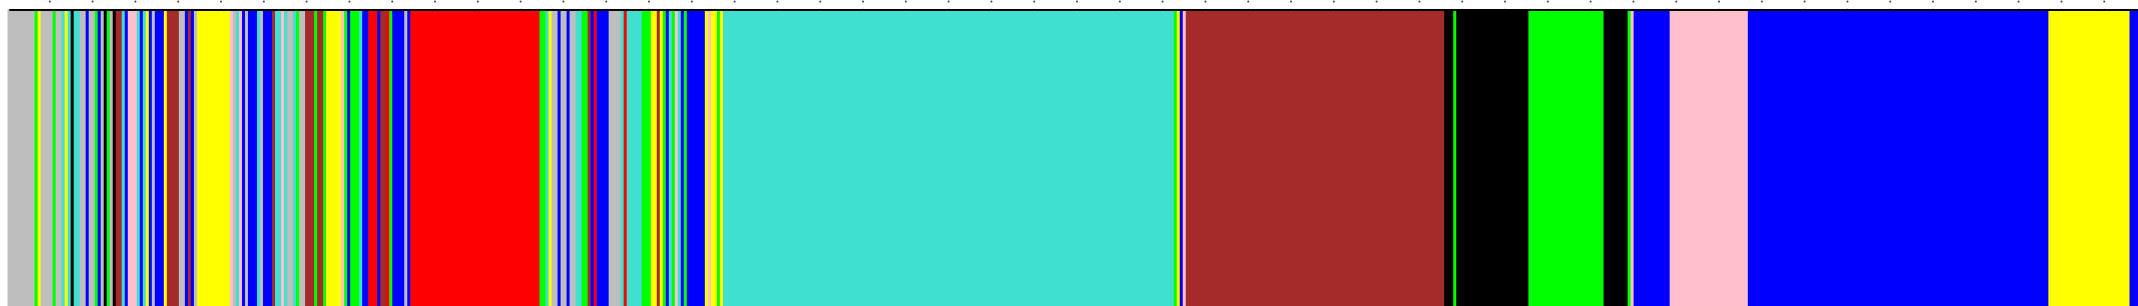

Dynamic Tree Cut

| Module color          | black | blue | brown | green | grey | pink | red | turquoise | yellow |
|-----------------------|-------|------|-------|-------|------|------|-----|-----------|--------|
| Number of metabolites | 38    | 160  | 103   | 51    | 43   | 37   | 49  | 175       | 56     |
