# Supplementary material for: Gut microbiome variation modulates the effects of dietary fiber on host metabolism
Source: PubMed Central journal article supplement (PMC8138933; doi:10.1186/s40168-021-01061-6), 2021-05-20
Supplement: 40168_2021_1061_MOESM16_ESM.pdf [file 40168_2021_1061_MOESM16_ESM.pdf]

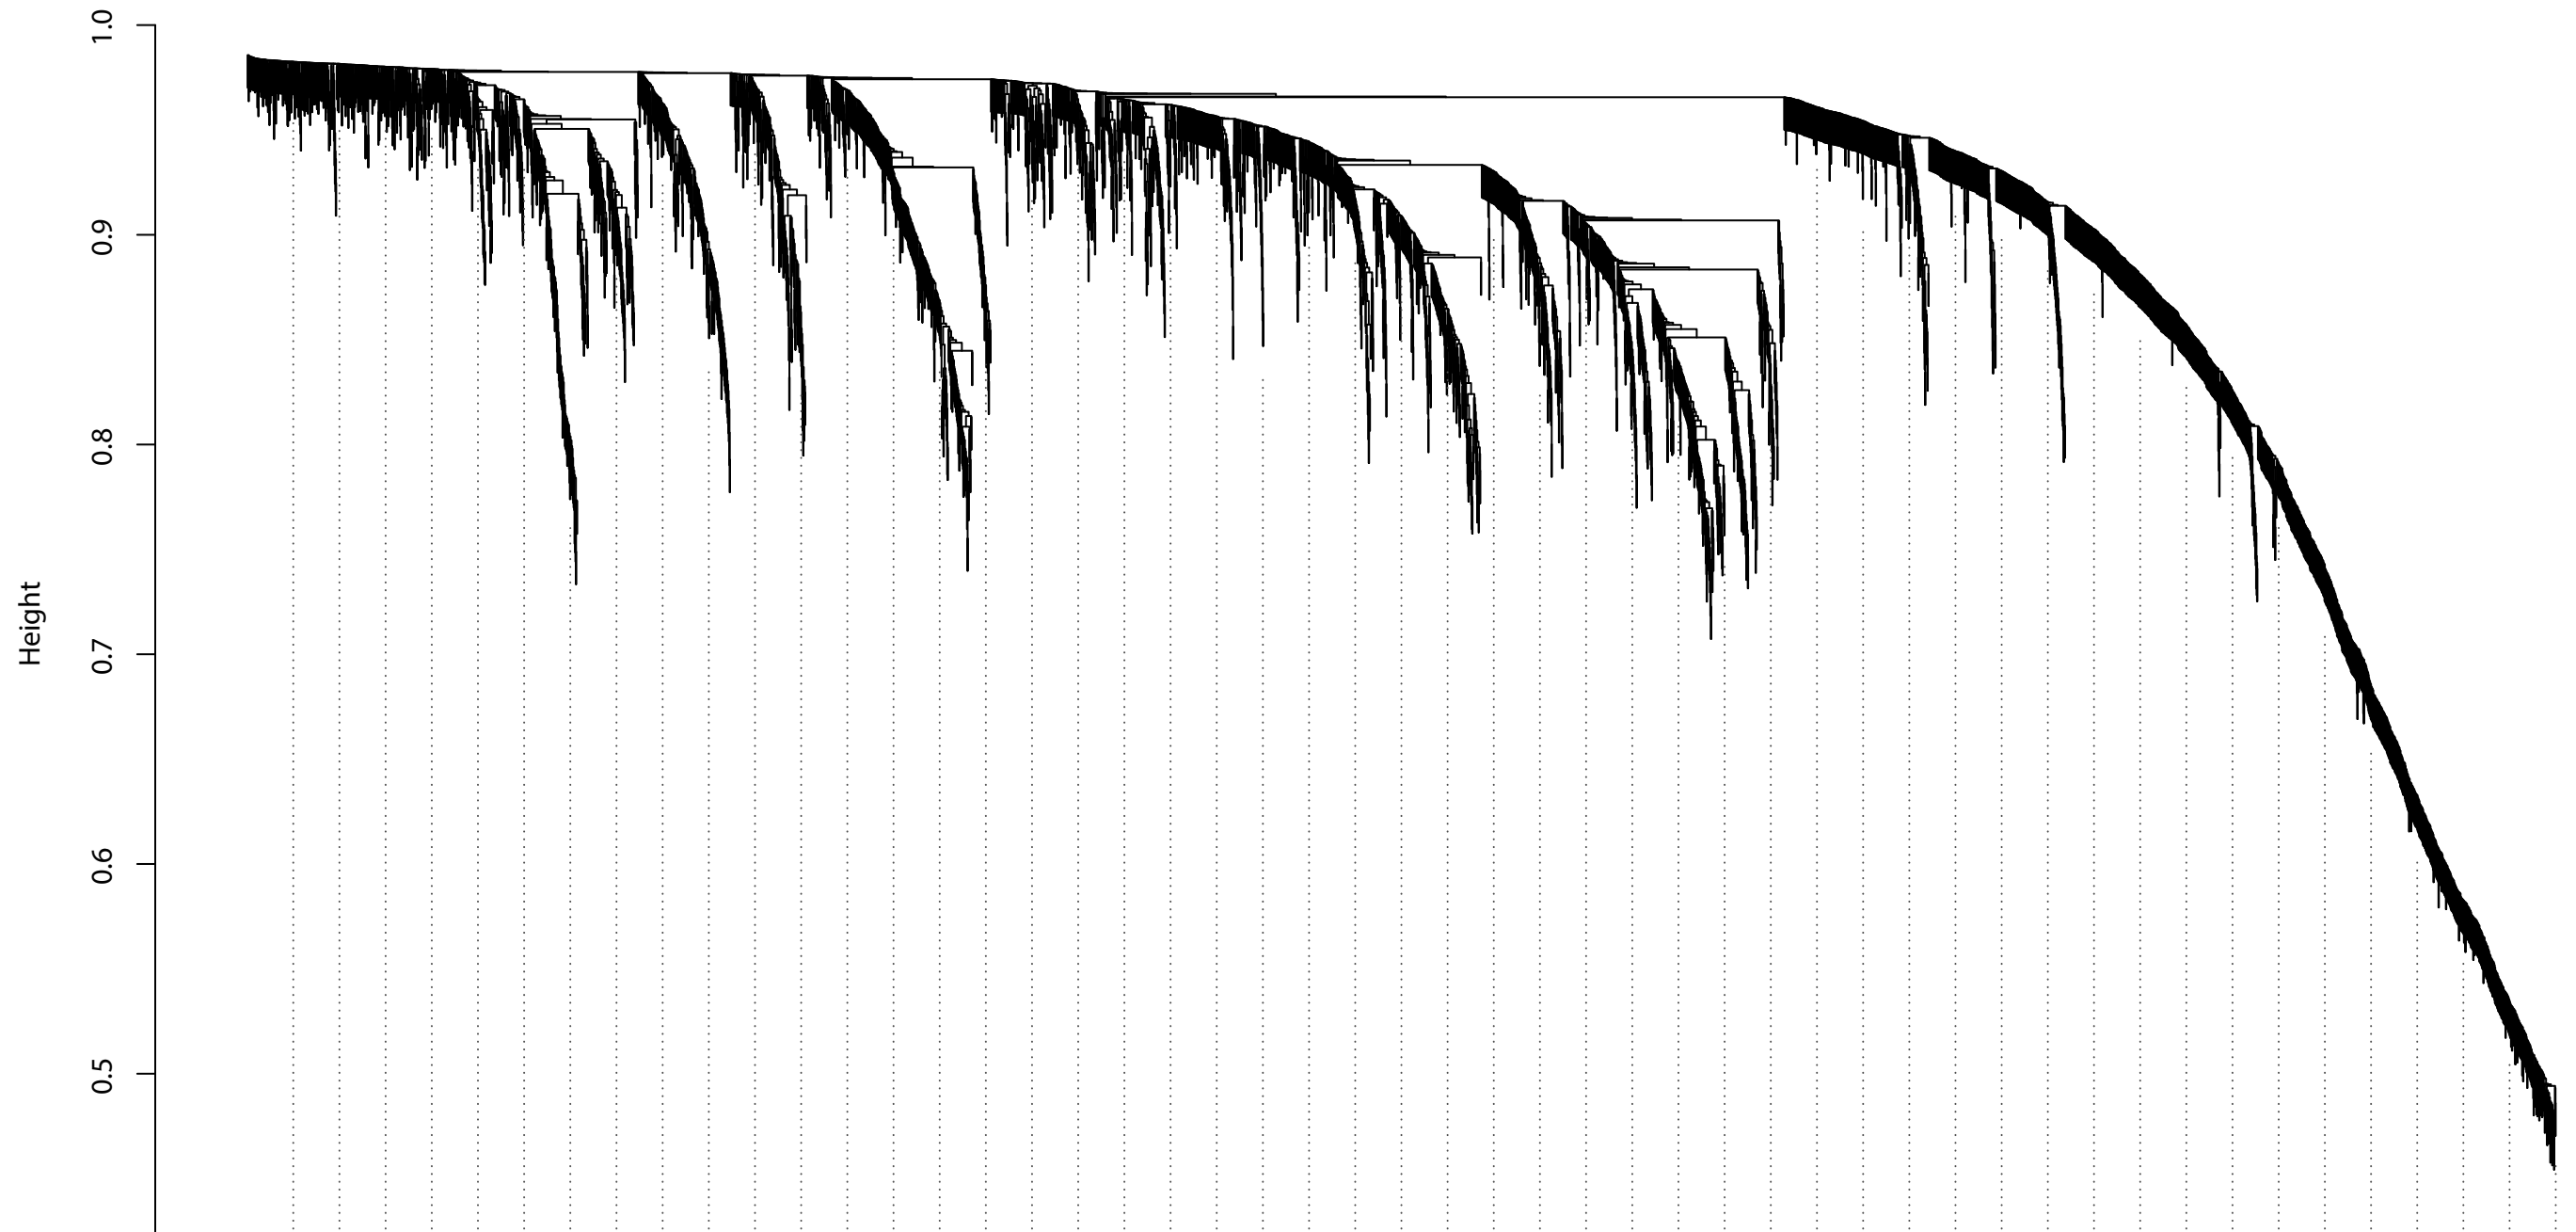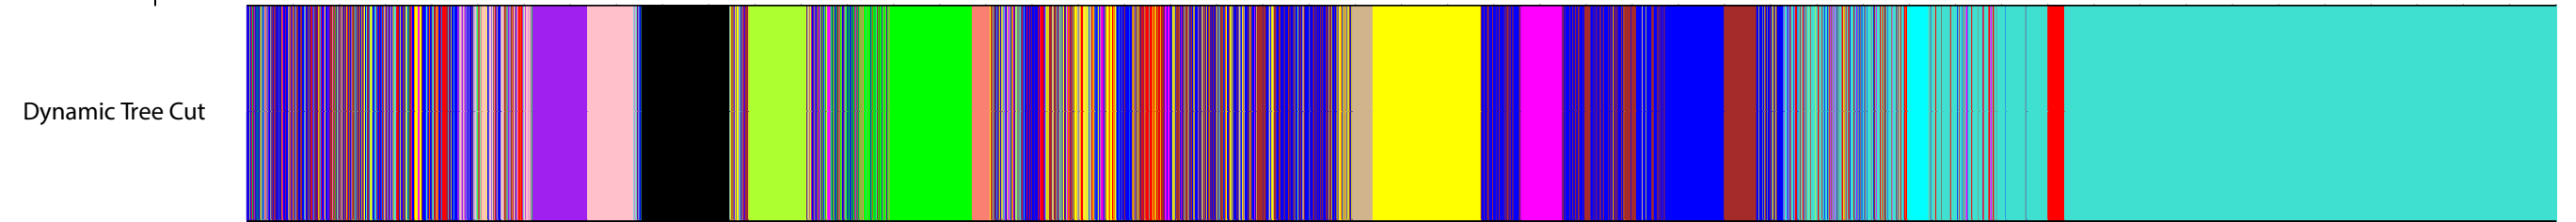

| Module color    | black | blue | brown | cyan | green | greenyellow | magenta | pink | purple | red | salmon | tan | turquoise | yellow |
|-----------------|-------|------|-------|------|-------|-------------|---------|------|--------|-----|--------|-----|-----------|--------|
| Number of genes | 192   | 922  | 542   | 51   | 256   | 124         | 166     | 171  | 152    | 226 | 61     | 109 | 1572      | 456    |
