# Supplementary material for: Gut microbiome variation modulates the effects of dietary fiber on host metabolism
Source: PubMed Central journal article supplement (PMC8138933; doi:10.1186/s40168-021-01061-6), 2021-05-20

**A****Blue module GO (BP) enrichment associated with adiposity phenotype**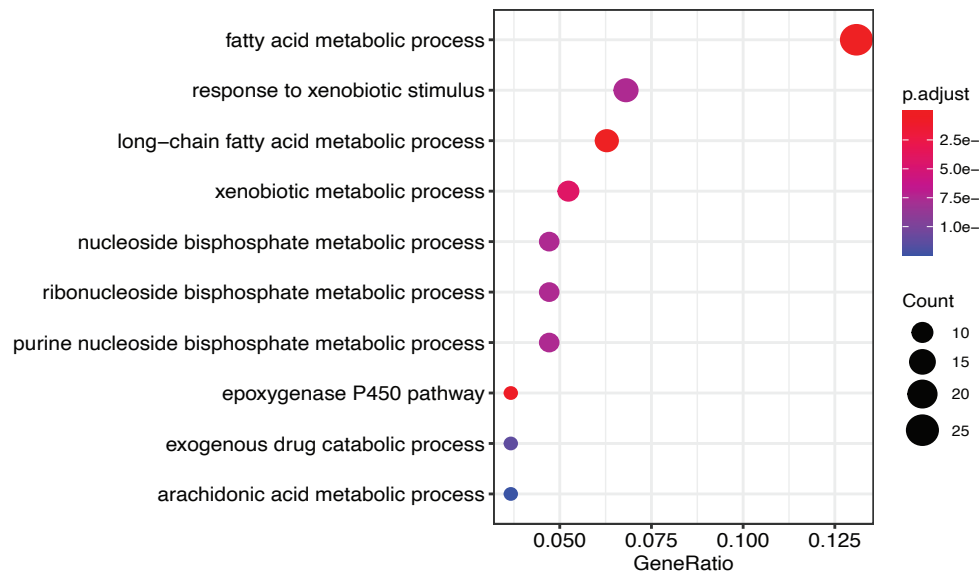**B****Blue module GO (BP) enrichment associated with liver TG phenotype**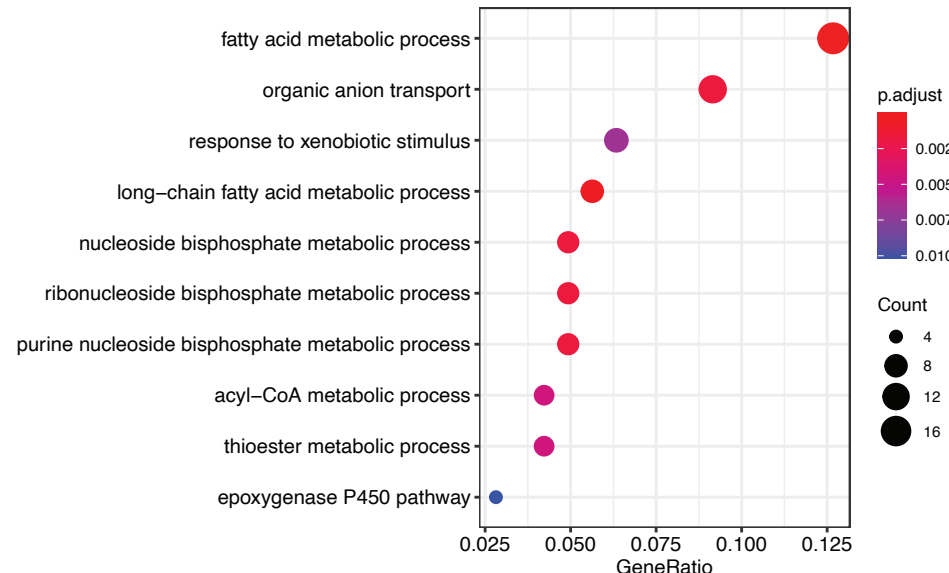**C****Blue module GO (BP) enrichment associated with glucose phenotype**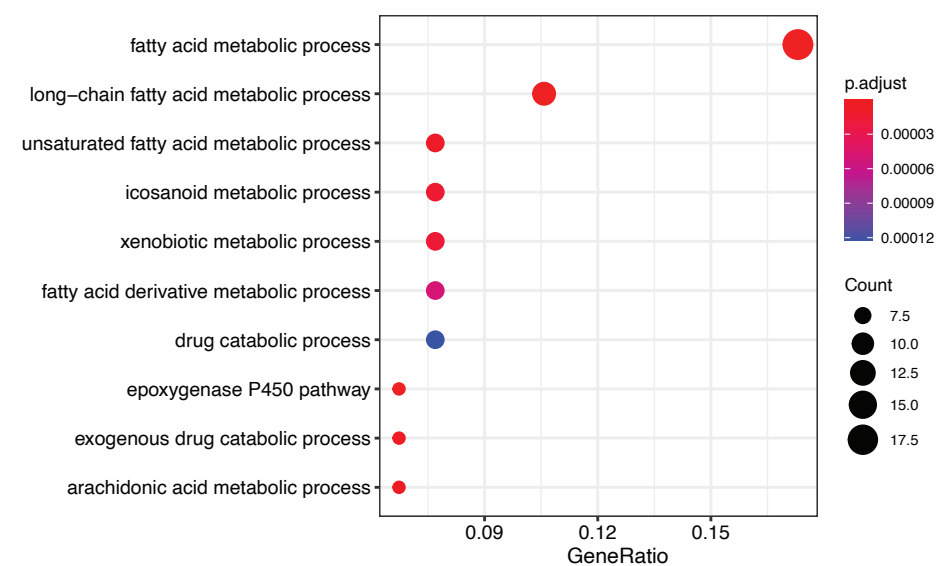**Blue module KEGG pathway enrichment associated with adiposity phenotype**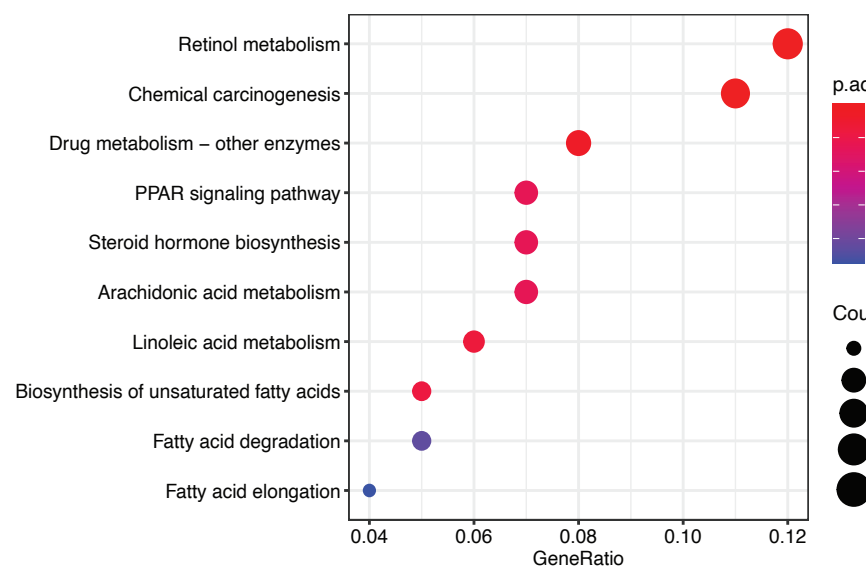**Blue module KEGG pathway enrichment associated with liver TG phenotype**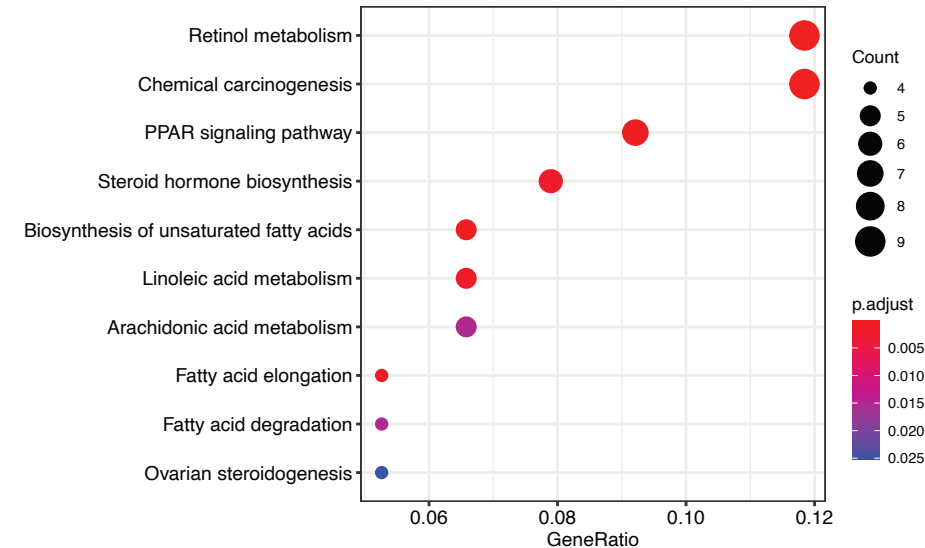**Blue module KEGG pathway enrichment associated with glucose phenotype**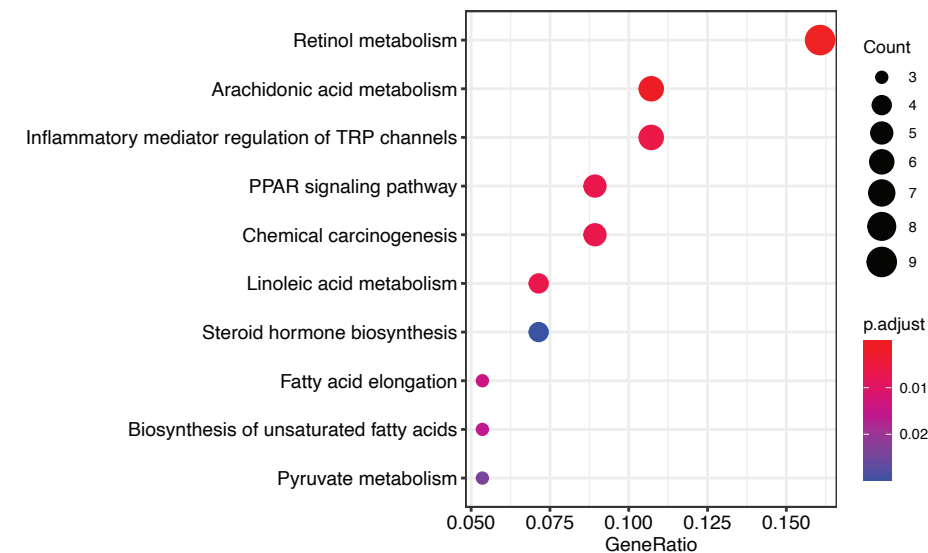

Supplement: 40168_2021_1061_MOESM17_ESM.pdf [file 40168_2021_1061_MOESM17_ESM.pdf]
